# Supplementary material for: Novel Ionic Liquid Synthesis of Bimetallic Fe–Ru Catalysts for the Direct Hydrogenation of CO2 to Short Chain Hydrocarbons
Source: MDPI journal article supplement (doi:10.3390/catal13121499), 2023-12-07
Supplement: s1 [file s1]

## SUPPORTING INFORMATION:

# Novel Ionic Liquid Synthesis of Bimetallic Fe–Ru Catalysts for the Direct Hydrogenation of CO<sub>2</sub> to Short Chain Hydrocarbons

Marina Maddaloni <sup>1,2</sup>, Ander Centeno-Pedraza <sup>3</sup>, Simone Avanzi <sup>1</sup>, Nayan Jyoti Mazumdar <sup>3</sup>, Haresh Manyar <sup>3</sup> and Nancy Artioli <sup>1,\*</sup>

<sup>1</sup> CEEP Laboratory, Department of Civil Engineering, Architecture, Territory, Environment and Mathematics, University of Brescia, via Branze 38, 25123 Brescia, Italy; marina.maddaloni@unibs.it (M.M.); s.avanzi002@studenti.unibs.it (S.A.)

<sup>2</sup> Consorzio Interuniversitario Nazionale per la Scienza e Tecnologia dei Materiali (INSTM), University of Brescia, via Branze 38, 25123 Brescia, Italy

<sup>3</sup> School of Chemistry and Chemical Engineering, Queen's University Belfast, David-Keir Building, Stranmillis Road, Belfast BT9 5AG, UK; a.centeno@qub.ac.uk (A.C.-P.); nmazumdar01@qub.ac.uk (N.J.M.); h.manyar@qub.ac.uk (H.M.)

\* Correspondence: nancy.artioli@unibs.it

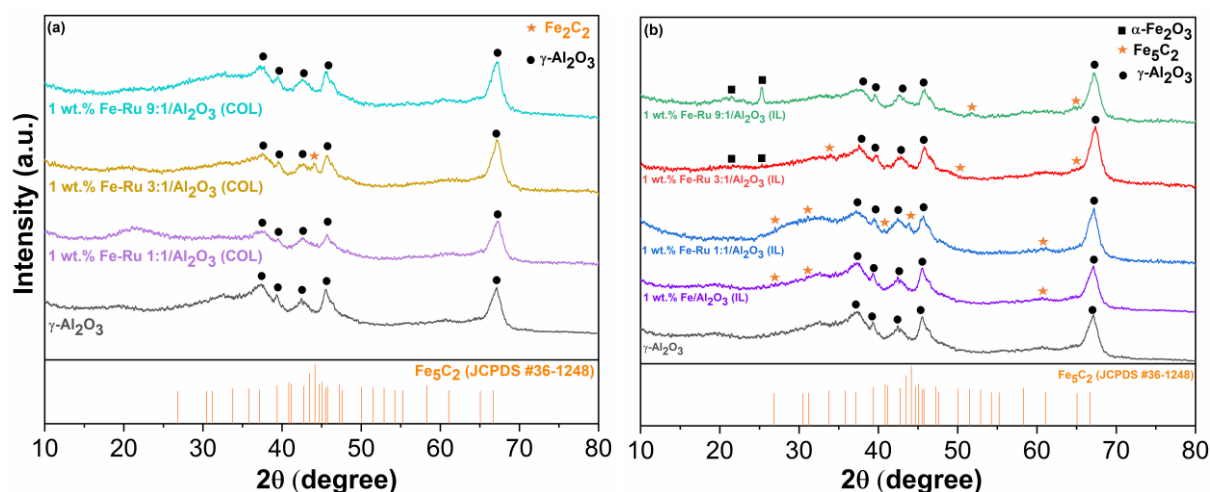

**Figure S1.** a) XRD patterns of spent catalysts 1 wt% Fe-Ru 1:1/Al<sub>2</sub>O<sub>3</sub> (COL) (in violet), 1 wt% Fe-Ru 3:1/Al<sub>2</sub>O<sub>3</sub> (COL) (in orange) and 1 wt% Fe-Ru 9:1/Al<sub>2</sub>O<sub>3</sub> (COL) (in light blue), compared with the pure  $\gamma$ -Al<sub>2</sub>O<sub>3</sub> b) XRD patterns of spent catalysts, 1 wt% Fe<sub>2</sub>O<sub>3</sub>/Al<sub>2</sub>O<sub>3</sub> (IL) (in violet), 1 wt% Fe-Ru 1:1/Al<sub>2</sub>O<sub>3</sub> (IL) (in blue), 1 wt% Fe-Ru 3:1/Al<sub>2</sub>O<sub>3</sub> (IL) (in red) and 1 wt% Fe-Ru 9:1/Al<sub>2</sub>O<sub>3</sub> (IL) (in green), compared with the pure  $\gamma$ -Al<sub>2</sub>O<sub>3</sub>.
