# Supplementary material for: Novel Ionic Liquid Synthesis of Bimetallic Fe–Ru Catalysts for the Direct Hydrogenation of CO2 to Short Chain Hydrocarbons
Source: MDPI journal article supplement (doi:10.3390/catal13121499), 2023-12-07
Supplement: s1 [file s1]

Archive with 1 entries (1 files):
- catalysts-2683609-supplementary.pdf
